# Supplementary material
Source: MDPI journal article supplement (https://www.mdpi.com/2311-7524/9/10/1078)
Supplement: s1 [file s1]

**Alterations in Nonvolatile Components of Tea (*Camellia sinensis*) Induced by Insect  
Feeding under Field Conditions**

**Ayumi Ito <sup>1</sup>, Jin Kamiya <sup>2</sup>, Nakako Katsuno <sup>1,3</sup> and Emiko Yanase <sup>1,3,\*</sup>**

<sup>1</sup> The United Graduate School of Agricultural Science, Gifu University, 1-1  
Yanagido, Gifu City 501-1193, Japan

<sup>2</sup> Gifu Prefectural Agricultural Technology Center, 729-1 Matamaru, Gifu City  
501-1152, Japan

<sup>3</sup> Faculty of Applied Biological Sciences, Gifu University, 1-1 Yanagido, Gifu City  
501-1193, Japan

\* Correspondence: yanase.emiko.h2@f.gifu-u.ac.jp; Tel./Fax: +81-58-293-2914

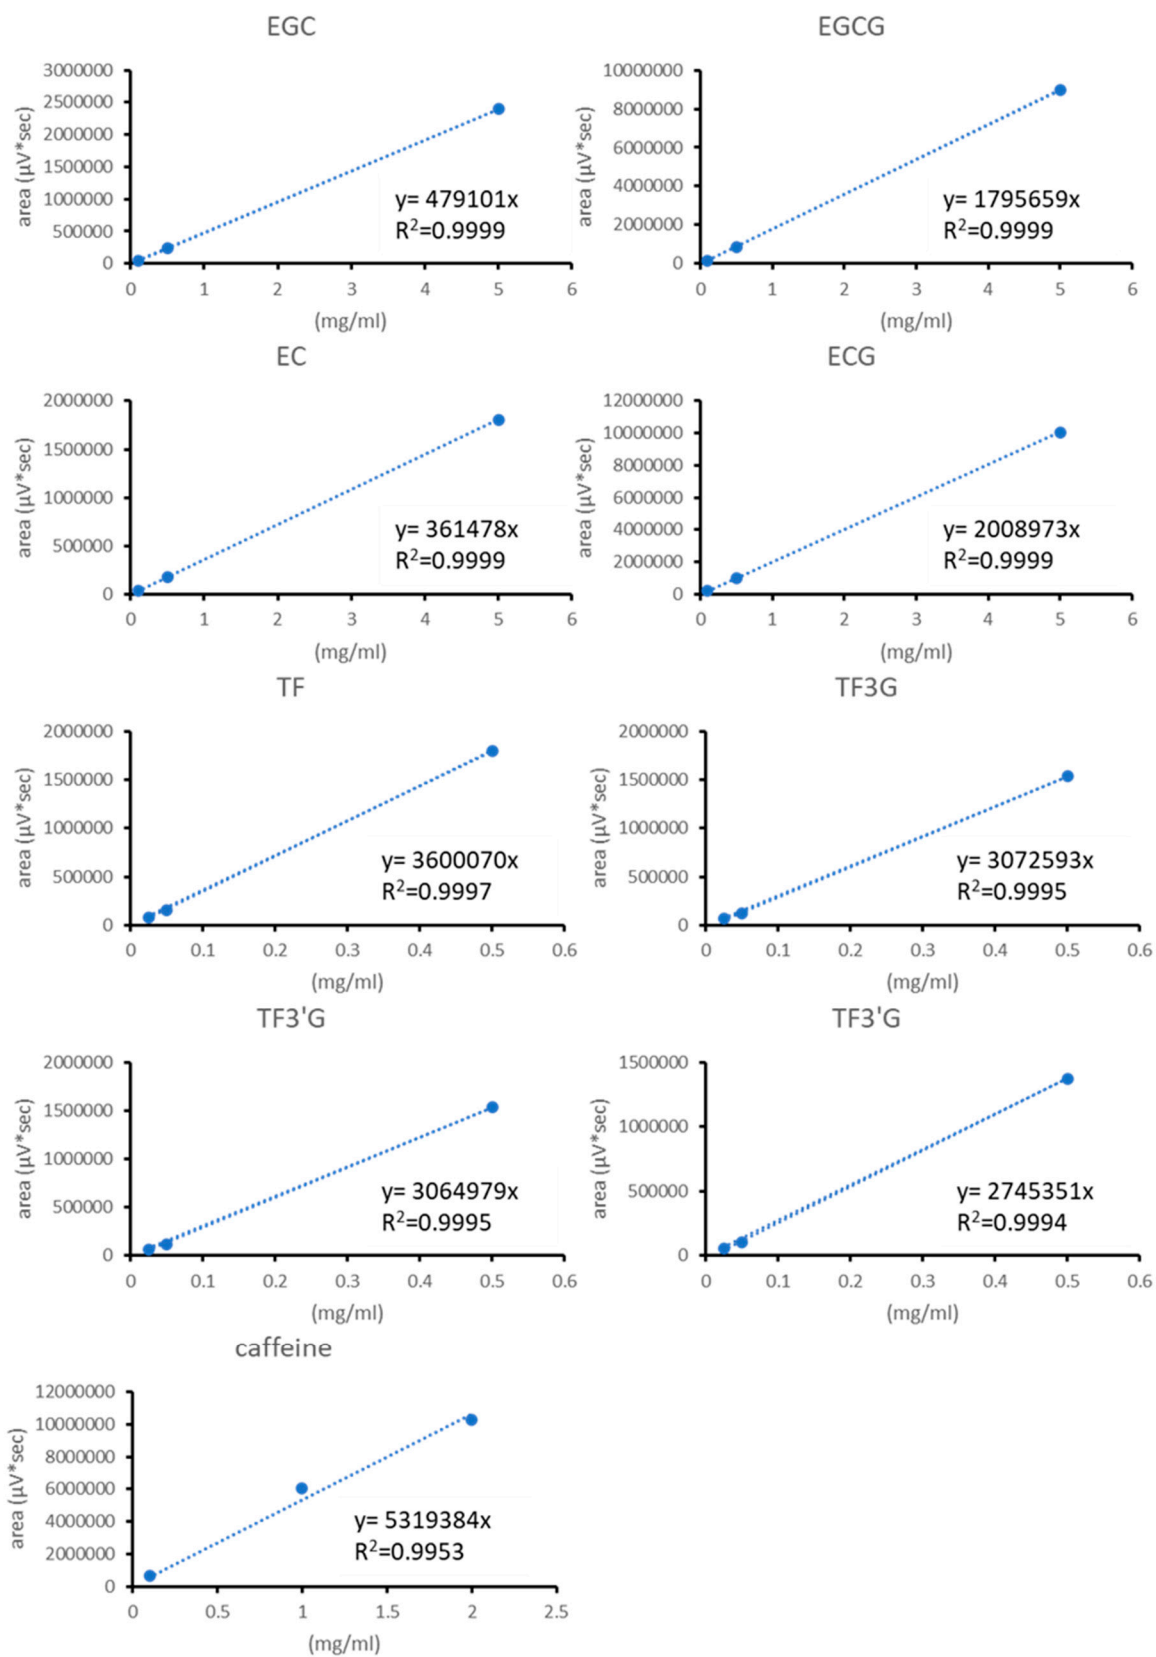

Figure S1. Calibration curves for catechins and theaflavins, caffeine

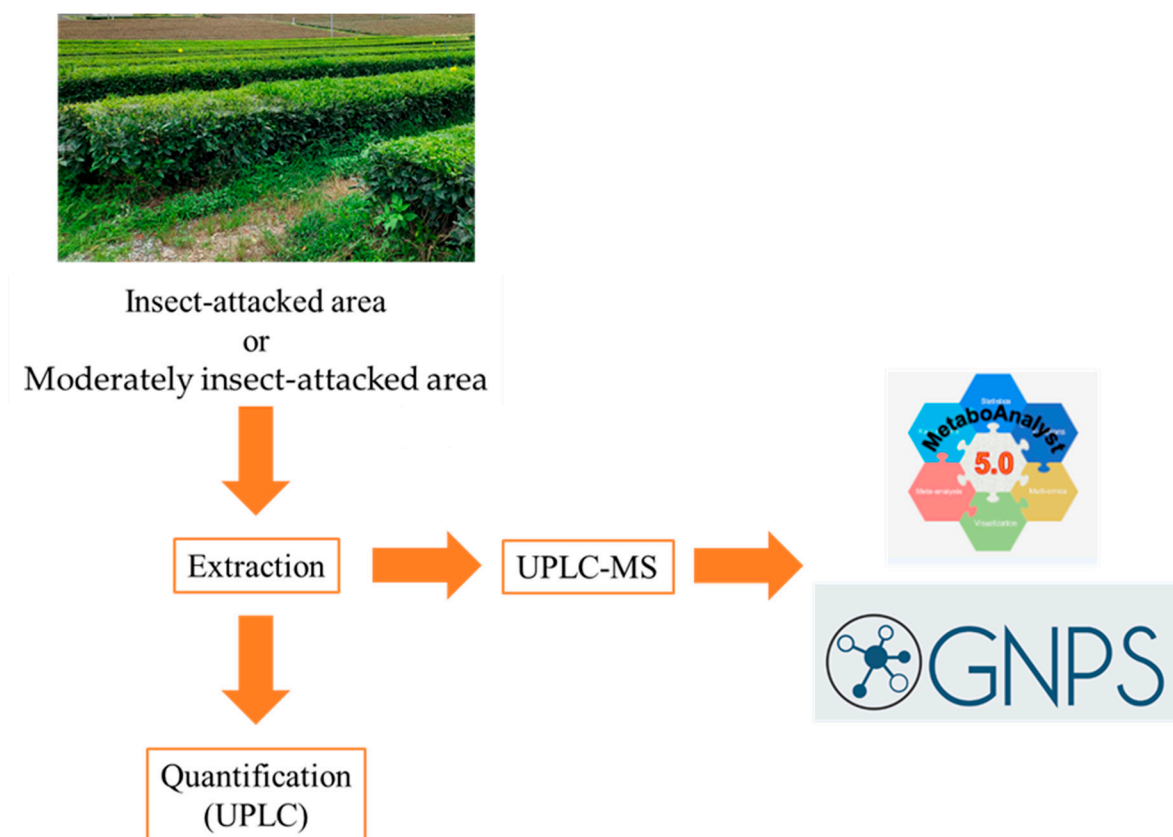

Figure S2. The process of the whole methodology in this study

Table S1 IDs list detected by MZmine.

| ID | RT    | <i>m/z</i> | ID | RT    | <i>m/z</i> | ID  | RT    | <i>m/z</i> |
|----|-------|------------|----|-------|------------|-----|-------|------------|
| 1  | 7.97  | 195.0855   | 36 | 12.83 | 319.0455   | 71  | 11.06 | 268.0739   |
| 2  | 0.89  | 175.1046   | 37 | 5.12  | 188.0671   | 72  | 0.83  | 402.1194   |
| 3  | 9.13  | 459.0938   | 38 | 14.30 | 487.0843   | 73  | 12.29 | 439.1559   |
| 4  | 5.75  | 307.0831   | 39 | 1.64  | 367.0654   | 74  | 11.82 | 595.1639   |
| 5  | 9.86  | 291.0884   | 40 | 0.60  | 543.1337   | 75  | 6.00  | 601.1305   |
| 6  | 0.89  | 158.0778   | 41 | 11.60 | 469.1302   | 76  | 1.26  | 165.0521   |
| 7  | 12.23 | 443.0981   | 42 | 4.11  | 612.1469   | 77  | 5.20  | 205.0938   |
| 8  | 12.23 | 465.0813   | 43 | 0.61  | 258.1098   | 78  | 9.78  | 261.1708   |
| 9  | 9.13  | 289.0716   | 44 | 7.44  | 764.1590   | 79  | 12.42 | 285.1298   |
| 10 | 9.85  | 313.0695   | 45 | 7.89  | 579.1486   | 80  | 15.97 | 355.1733   |
| 11 | 3.46  | 181.0687   | 46 | 13.12 | 565.1539   | 81  | 8.06  | 293.0997   |
| 12 | 14.98 | 779.2021   | 47 | 13.97 | 487.2147   | 82  | 5.79  | 666.0643   |
| 13 | 13.96 | 795.1959   | 48 | 5.70  | 361.0894   | 83  | 13.01 | 587.1359   |
| 14 | 9.13  | 481.0766   | 49 | 15.89 | 287.0553   | 84  | 12.75 | 481.0946   |
| 15 | 0.61  | 381.0809   | 50 | 1.34  | 182.0781   | 85  | 1.22  | 178.0888   |
| 16 | 5.75  | 329.0653   | 51 | 10.64 | 425.1399   | 86  | 9.36  | 373.1808   |
| 17 | 0.64  | 351.0716   | 52 | 13.57 | 401.1554   | 87  | 13.14 | 587.1352   |
| 18 | 14.11 | 795.1973   | 53 | 0.68  | 365.1054   | 88  | 13.04 | 563.2078   |
| 19 | 1.15  | 268.1053   | 54 | 12.90 | 503.0789   | 89  | 14.97 | 398.0793   |
| 20 | 2.52  | 307.0818   | 55 | 12.79 | 261.1690   | 90  | 0.62  | 513.1243   |
| 21 | 1.70  | 345.0834   | 56 | 8.62  | 361.0894   | 91  | 13.95 | 406.0774   |
| 22 | 12.23 | 273.0759   | 57 | 16.27 | 487.2138   | 92  | 1.79  | 167.0534   |
| 23 | 10.38 | 441.1727   | 58 | 4.67  | 763.1470   | 93  | 4.60  | 298.0936   |
| 24 | 13.84 | 303.0507   | 59 | 0.80  | 175.1064   | 94  | 1.15  | 307.0830   |
| 25 | 10.40 | 361.0887   | 60 | 7.99  | 217.0734   | 95  | 14.67 | 633.1407   |
| 26 | 15.78 | 779.1982   | 61 | 5.48  | 185.0414   | 96  | 12.56 | 561.1920   |
| 27 | 5.67  | 635.1381   | 62 | 1.48  | 171.0248   | 97  | 11.71 | 275.0901   |
| 28 | 5.75  | 289.0724   | 63 | 12.54 | 439.1561   | 98  | 1.03  | 227.0153   |
| 29 | 12.81 | 503.0793   | 64 | 9.82  | 634.0754   | 99  | 13.72 | 449.0848   |
| 30 | 15.04 | 287.0556   | 65 | 5.66  | 361.0882   | 100 | 11.72 | 297.0815   |
| 31 | 6.04  | 579.1499   | 66 | 10.41 | 605.1470   | 101 | 0.97  | 167.0537   |
| 32 | 14.16 | 303.0492   | 67 | 1.62  | 153.0135   | 102 | 2.48  | 306.0939   |
| 33 | 9.87  | 603.1477   | 68 | 2.74  | 166.0822   | 103 | 12.25 | 405.1725   |
| 34 | 9.05  | 939.1559   | 69 | 15.72 | 471.0896   | 104 | 8.00  | 747.1542   |
| 35 | 12.84 | 565.1560   | 70 | 12.87 | 319.0446   | 105 | 14.17 | 406.0778   |

| ID  | RT    | <i>m/z</i> | ID  | RT    | <i>m/z</i> | ID  | RT    | <i>m/z</i> |
|-----|-------|------------|-----|-------|------------|-----|-------|------------|
| 106 | 10.96 | 373.1820   | 141 | 13.69 | 475.0996   | 176 | 14.03 | 289.0703   |
| 107 | 14.51 | 487.0836   | 142 | 5.48  | 278.9821   | 177 | 10.33 | 596.1553   |
| 108 | 0.87  | 299.0965   | 143 | 14.63 | 457.2396   | 178 | 5.00  | 579.1492   |
| 109 | 9.90  | 731.1571   | 144 | 16.23 | 471.0897   | 179 | 14.54 | 611.1597   |
| 110 | 1.40  | 152.0501   | 145 | 13.77 | 427.1021   | 180 | 16.30 | 287.0557   |
| 111 | 13.40 | 417.1710   | 146 | 5.92  | 447.0558   | 181 | 4.63  | 333.0607   |
| 112 | 1.90  | 171.0232   | 147 | 13.60 | 433.1136   | 182 | 0.94  | 593.1285   |
| 113 | 1.44  | 153.0137   | 148 | 1.18  | 313.0579   | 183 | 5.80  | 401.0245   |
| 114 | 1.39  | 264.9661   | 149 | 5.94  | 657.0703   | 184 | 8.64  | 395.1314   |
| 115 | 15.95 | 398.0814   | 150 | 4.98  | 633.1081   | 185 | 4.24  | 579.1502   |
| 116 | 15.55 | 287.0558   | 151 | 8.04  | 326.0340   | 186 | 12.26 | 411.1632   |
| 117 | 13.94 | 475.1011   | 152 | 13.71 | 355.1739   | 187 | 11.02 | 433.1156   |
| 118 | 15.42 | 545.1983   | 153 | 16.63 | 617.1470   | 188 | 6.56  | 323.0739   |
| 119 | 2.51  | 289.0715   | 154 | 24.56 | 471.2206   | 189 | 11.18 | 411.1976   |
| 120 | 7.34  | 507.0748   | 155 | 10.95 | 320.1120   | 190 | 13.37 | 355.1728   |
| 121 | 2.43  | 329.0652   | 156 | 13.73 | 185.1122   | 191 | 8.10  | 349.0910   |
| 122 | 10.47 | 565.1543   | 157 | 10.44 | 547.1460   | 192 | 12.83 | 593.2211   |
| 123 | 14.12 | 355.1726   | 158 | 10.85 | 715.1650   | 193 | 21.75 | 617.1246   |
| 124 | 14.91 | 795.1768   | 159 | 15.78 | 449.1084   | 194 | 17.68 | 457.2407   |
| 125 | 11.90 | 633.1067   | 160 | 15.20 | 487.2133   | 195 | 13.12 | 579.1499   |
| 126 | 10.29 | 441.1722   | 161 | 7.29  | 321.0614   | 196 | 14.79 | 621.1798   |
| 127 | 10.79 | 337.0909   | 162 | 13.04 | 649.1352   | 197 | 6.07  | 427.1036   |
| 128 | 9.96  | 439.1610   | 163 | 7.39  | 747.1565   | 198 | 14.75 | 325.0550   |
| 129 | 1.06  | 215.0148   | 164 | 13.52 | 275.1858   | 199 | 7.32  | 315.0720   |
| 130 | 14.57 | 535.1442   | 165 | 1.27  | 355.0652   | 200 | 1.66  | 275.1123   |
| 131 | 11.92 | 659.0836   | 166 | 11.04 | 411.1642   | 201 | 5.38  | 153.0133   |
| 132 | 1.44  | 284.0992   | 167 | 7.00  | 349.0910   | 202 | 13.04 | 399.1439   |
| 133 | 24.31 | 471.2204   | 168 | 2.54  | 401.0209   | 203 | 10.93 | 275.1870   |
| 134 | 0.99  | 169.0102   | 169 | 1.16  | 304.1542   | 204 | 16.51 | 287.0557   |
| 135 | 14.46 | 303.0487   | 170 | 11.03 | 473.1040   | 205 | 3.38  | 312.0172   |
| 136 | 14.03 | 465.1027   | 171 | 13.79 | 257.0815   | 206 | 15.69 | 449.1102   |
| 137 | 11.81 | 655.0887   | 172 | 14.02 | 453.1192   | 207 | 14.68 | 185.1129   |
| 138 | 9.96  | 361.0878   | 173 | 7.93  | 601.1316   | 208 | 10.13 | 371.1700   |
| 139 | 12.03 | 361.0909   | 174 | 10.31 | 867.2102   | 209 | 14.48 | 597.2308   |
| 140 | 9.86  | 439.1579   | 175 | 4.83  | 458.1093   | 210 | 12.95 | 565.1548   |

| ID  | RT    | <i>m/z</i> | ID  | RT    | <i>m/z</i> | ID  | RT    | <i>m/z</i> |
|-----|-------|------------|-----|-------|------------|-----|-------|------------|
| 211 | 2.66  | 259.0443   | 246 | 2.86  | 259.0421   | 281 | 11.30 | 645.1915   |
| 212 | 15.12 | 431.1699   | 247 | 19.08 | 153.1229   | 282 | 13.25 | 417.1718   |
| 213 | 3.32  | 203.0540   | 248 | 11.41 | 505.2246   | 283 | 14.11 | 487.2159   |
| 214 | 15.66 | 487.2149   | 249 | 12.86 | 491.0961   | 284 | 16.90 | 455.1740   |
| 215 | 3.44  | 763.1505   | 250 | 9.54  | 287.0549   | 285 | 11.60 | 563.2086   |
| 216 | 26.51 | 315.2145   | 251 | 9.59  | 289.0726   | 286 | 3.26  | 220.1183   |
| 217 | 14.48 | 597.2311   | 252 | 14.54 | 597.2313   | 287 | 9.60  | 493.1833   |
| 218 | 14.60 | 633.1422   | 253 | 13.80 | 525.2888   | 288 | 11.91 | 413.1792   |
| 219 | 27.57 | 391.2117   | 254 | 1.96  | 203.0783   | 289 | 4.04  | 384.1159   |
| 220 | 4.68  | 785.1295   | 255 | 10.77 | 459.0929   | 290 | 26.71 | 315.1214   |
| 221 | 5.03  | 655.0926   | 256 | 14.80 | 355.1735   | 291 | 16.87 | 495.1638   |
| 222 | 7.25  | 287.0557   | 257 | 5.86  | 291.0885   | 292 | 7.03  | 377.0852   |
| 223 | 14.17 | 611.1619   | 258 | 0.66  | 353.0790   | 293 | 11.61 | 563.2072   |
| 224 | 1.33  | 171.0258   | 259 | 0.84  | 175.1069   | 294 | 8.60  | 392.0209   |
| 225 | 5.36  | 243.0473   | 260 | 14.62 | 535.1435   | 295 | 8.55  | 438.0260   |
| 226 | 2.37  | 611.1401   | 261 | 9.93  | 310.0586   | 296 | 10.23 | 425.1437   |
| 227 | 6.46  | 867.2124   | 262 | 10.61 | 745.1391   | 297 | 23.43 | 245.0793   |
| 228 | 1.17  | 503.0789   | 263 | 26.35 | 427.2297   | 298 | 16.15 | 487.2150   |
| 229 | 13.39 | 617.1108   | 264 | 12.36 | 593.1299   | 299 | 13.95 | 487.2158   |
| 230 | 16.43 | 821.2075   | 265 | 10.60 | 785.1324   | 300 | 0.63  | 194.0827   |
| 231 | 11.90 | 449.0858   | 266 | 9.85  | 597.1235   | 301 | 0.63  | 194.0827   |
| 232 | 12.09 | 633.1144   | 267 | 5.54  | 166.0822   | 302 | 27.86 | 227.1427   |
| 233 | 1.45  | 355.0642   | 268 | 13.18 | 785.1309   | 303 | 1.24  | 233.1482   |
| 234 | 12.41 | 437.2374   | 269 | 13.79 | 401.1579   | 304 | 1.22  | 385.9950   |
| 235 | 0.74  | 203.0518   | 270 | 5.15  | 259.1165   | 305 | 15.57 | 193.1232   |
| 236 | 8.64  | 165.0527   | 271 | 14.31 | 465.1024   | 306 | 8.13  | 391.1583   |
| 237 | 10.35 | 579.1518   | 272 | 12.62 | 811.1902   | 307 | 1.25  | 289.9755   |
| 238 | 10.91 | 761.1361   | 273 | 13.12 | 745.1383   | 308 | 26.53 | 269.0689   |
| 239 | 9.69  | 921.1475   | 274 | 0.70  | 203.0524   | 309 | 1.03  | 314.0954   |
| 240 | 0.93  | 304.1549   | 275 | 13.44 | 617.1154   | 310 | 2.16  | 383.1467   |
| 241 | 13.39 | 639.0939   | 276 | 13.10 | 665.1240   | 311 | 5.82  | 289.0704   |
| 242 | 9.54  | 899.1673   | 277 | 12.60 | 745.1377   | 312 | 1.99  | 221.0930   |
| 243 | 7.20  | 915.1590   | 278 | 11.72 | 745.1390   | 313 | 8.33  | 318.0973   |
| 244 | 7.76  | 286.1283   | 279 | 8.48  | 593.1305   | 314 | 7.47  | 153.0135   |
| 245 | 13.78 | 289.0706   | 280 | 12.54 | 455.1345   | 315 | 5.18  | 318.0957   |

| ID  | RT    | <i>m/z</i> | ID  | RT    | <i>m/z</i> | ID  | RT    | <i>m/z</i> |
|-----|-------|------------|-----|-------|------------|-----|-------|------------|
| 316 | 15.07 | 487.2172   | 351 | 12.59 | 455.1316   | 386 | 13.99 | 475.1001   |
| 317 | 15.35 | 355.1739   | 352 | 14.87 | 355.1730   | 387 | 24.61 | 471.2206   |
| 318 | 10.15 | 411.1642   | 353 | 12.49 | 937.1404   | 388 | 14.64 | 487.0843   |
| 319 | 11.49 | 633.0878   | 354 | 12.52 | 897.1462   | 389 | 23.54 | 177.0524   |
| 320 | 13.00 | 563.2069   | 355 | 0.69  | 465.2082   | 390 | 26.51 | 315.2144   |
| 321 | 10.63 | 441.1234   | 356 | 16.09 | 153.1235   | 391 | 14.07 | 453.1180   |
| 322 | 11.29 | 905.1550   | 357 | 16.32 | 487.2144   | 392 | 22.70 | 617.1288   |
| 323 | 2.59  | 287.0563   | 358 | 13.50 | 617.1221   | 393 | 5.98  | 289.0721   |
| 324 | 11.34 | 905.1540   | 359 | 14.31 | 487.2170   | 394 | 16.44 | 471.0894   |
| 325 | 16.39 | 459.1067   | 360 | 10.66 | 481.0753   | 395 | 16.15 | 153.1231   |
| 326 | 13.94 | 487.2165   | 361 | 6.06  | 915.1629   | 396 | 21.48 | 241.2023   |
| 327 | 11.28 | 441.0821   | 362 | 4.15  | 187.0943   | 397 | 17.15 | 455.1742   |
| 328 | 4.86  | 334.0892   | 363 | 10.71 | 737.1490   | 398 | 21.48 | 213.1425   |
| 329 | 7.19  | 937.1436   | 364 | 12.56 | 369.1523   | 399 | 14.78 | 611.1590   |
| 330 | 4.58  | 284.1115   | 365 | 14.88 | 373.1842   | 400 | 22.09 | 264.2340   |
| 331 | 3.73  | 595.1453   | 366 | 16.14 | 252.0912   | 401 | 17.06 | 495.1644   |
| 332 | 12.13 | 371.1701   | 367 | 11.03 | 373.1841   | 402 | 16.77 | 287.0557   |
| 333 | 9.40  | 418.1692   | 368 | 11.28 | 469.1325   | 403 | 11.22 | 153.1227   |
| 334 | 12.09 | 867.1735   | 369 | 11.43 | 307.1147   | 404 | 14.79 | 611.1591   |
| 335 | 15.68 | 579.2195   | 370 | 11.29 | 883.1720   |     |       |            |
| 336 | 16.71 | 397.2196   | 371 | 11.74 | 425.0876   |     |       |            |
| 337 | 10.56 | 420.1871   | 372 | 1.08  | 290.1363   |     |       |            |
| 338 | 0.55  | 182.9625   | 373 | 15.23 | 457.2390   |     |       |            |
| 339 | 6.90  | 365.1185   | 374 | 25.30 | 277.0864   |     |       |            |
| 340 | 0.65  | 402.1633   | 375 | 23.54 | 245.0782   |     |       |            |
| 341 | 12.24 | 317.0687   | 376 | 14.21 | 303.0489   |     |       |            |
| 342 | 15.35 | 261.9097   | 377 | 15.93 | 779.1973   |     |       |            |
| 343 | 14.39 | 261.9097   | 378 | 16.05 | 355.1725   |     |       |            |
| 344 | 14.32 | 406.0766   | 379 | 12.99 | 565.1538   |     |       |            |
| 345 | 13.97 | 261.9100   | 380 | 12.60 | 439.1562   |     |       |            |
| 346 | 20.22 | 163.9744   | 381 | 17.79 | 457.2403   |     |       |            |
| 347 | 18.32 | 163.9741   | 382 | 22.60 | 257.1716   |     |       |            |
| 348 | 1.77  | 261.1109   | 383 | 8.16  | 747.1564   |     |       |            |
| 349 | 14.97 | 487.2166   | 384 | 22.68 | 257.1716   |     |       |            |
| 350 | 12.11 | 889.1557   | 385 | 14.76 | 303.0466   |     |       |            |





Table S2 Components abundance in area B (second-flush fresh tea)

| ID  | RT    | <i>m/z</i> | area B/ area A ratio <sup>a</sup> |
|-----|-------|------------|-----------------------------------|
| 1   | 7.97  | 195.0855   | 1.20                              |
| 7   | 12.23 | 443.0981   | 1.37                              |
| 21  | 1.70  | 345.0834   | 1.58                              |
| 22  | 12.23 | 273.0759   | 1.36                              |
| 37  | 5.12  | 188.0671   | 1.54                              |
| 39  | 1.64  | 367.0654   | 1.56                              |
| 50  | 1.34  | 182.0781   | 1.25                              |
| 61  | 5.48  | 185.0414   | 2.06                              |
| 67  | 1.62  | 153.0135   | 1.37                              |
| 77  | 5.20  | 205.0938   | 1.58                              |
| 80  | 15.97 | 355.1733   | 2.63                              |
| 99  | 13.72 | 449.0848   | 1.65                              |
| 101 | 0.97  | 167.0537   | 1.45                              |
| 103 | 12.25 | 405.1725   | 2.36                              |
| 106 | 10.96 | 373.1820   | 1.84                              |
| 108 | 0.87  | 299.0965   | 1.43                              |
| 109 | 9.90  | 731.1571   | 1.80                              |
| 123 | 14.12 | 355.1726   | 2.90                              |
| 131 | 11.92 | 659.0836   | 2.27                              |
| 136 | 14.03 | 465.1027   | 1.40                              |
| 142 | 5.48  | 278.9821   | 1.78                              |
| 143 | 14.63 | 457.2396   | 2.25                              |
| 145 | 13.77 | 427.1021   | 1.89                              |
| 146 | 5.92  | 447.0558   | 2.39                              |
| 149 | 5.94  | 657.0703   | 2.06                              |
| 154 | 24.56 | 471.2206   | 1.60                              |
| 155 | 10.95 | 320.1120   | 1.40                              |
| 158 | 10.85 | 715.1650   | 1.42                              |
| 163 | 7.39  | 747.1565   | 1.31                              |
| 166 | 11.04 | 411.1642   | 2.22                              |
| 171 | 13.79 | 257.0815   | 1.78                              |
| 174 | 10.31 | 867.2102   | 1.31                              |
| 176 | 14.03 | 289.0703   | 1.25                              |
| 181 | 4.63  | 333.0607   | 1.29                              |

|     |       |          |      |
|-----|-------|----------|------|
| 186 | 12.26 | 411.1632 | 2.86 |
| 188 | 6.56  | 323.0739 | 1.58 |
| 190 | 13.37 | 355.1728 | 2.69 |
| 195 | 13.12 | 579.1499 | 1.35 |
| 199 | 7.32  | 315.0720 | 1.75 |
| 201 | 5.38  | 153.0133 | 1.99 |
| 214 | 15.66 | 487.2149 | 2.76 |
| 222 | 7.25  | 287.0557 | 1.44 |
| 226 | 2.37  | 611.1401 | 1.96 |
| 233 | 1.45  | 355.0642 | 1.87 |
| 234 | 12.41 | 437.2374 | 1.32 |
| 239 | 9.69  | 921.1475 | 1.52 |
| 242 | 9.54  | 899.1673 | 1.54 |
| 243 | 7.20  | 915.1590 | 1.44 |
| 244 | 7.76  | 286.1283 | 2.67 |
| 248 | 11.41 | 505.2246 | 1.61 |
| 250 | 9.54  | 287.0549 | 1.62 |
| 254 | 1.96  | 203.0783 | 2.08 |
| 270 | 5.15  | 259.1165 | 1.97 |
| 271 | 14.31 | 465.1024 | 3.08 |
| 288 | 11.91 | 413.1792 | 2.83 |
| 290 | 26.71 | 315.1214 | 1.54 |
| 291 | 16.87 | 495.1638 | 1.60 |
| 302 | 27.86 | 227.1427 | 1.99 |
| 305 | 15.57 | 193.1232 | 3.21 |
| 306 | 8.13  | 391.1583 | 2.11 |
| 310 | 2.16  | 383.1467 | 1.51 |
| 312 | 1.99  | 221.0930 | 1.67 |
| 313 | 8.33  | 318.0973 | 1.68 |
| 314 | 7.47  | 153.0135 | 1.43 |
| 315 | 5.18  | 318.0957 | 1.83 |
| 318 | 10.15 | 411.1642 | 2.36 |
| 322 | 11.29 | 905.1550 | 2.00 |
| 324 | 11.34 | 905.1540 | 1.74 |
| 325 | 16.39 | 459.1067 | 1.40 |
| 327 | 11.28 | 441.0821 | 2.46 |

|     |       |          |      |
|-----|-------|----------|------|
| 328 | 4.86  | 334.0892 | 1.49 |
| 330 | 4.58  | 284.1115 | 1.64 |
| 332 | 12.13 | 371.1701 | 2.23 |
| 334 | 12.09 | 867.1735 | 1.67 |
| 337 | 10.56 | 420.1871 | 1.40 |
| 350 | 12.11 | 889.1557 | 1.87 |
| 355 | 0.69  | 465.2082 | 2.73 |
| 359 | 14.31 | 487.2170 | 2.07 |
| 361 | 6.06  | 915.1629 | 1.95 |
| 365 | 14.88 | 373.1842 | 2.31 |
| 370 | 11.29 | 883.1720 | 1.98 |
| 371 | 11.74 | 425.0876 | 1.61 |
| 373 | 15.23 | 457.2390 | 4.88 |
| 380 | 12.60 | 439.1562 | 1.72 |

---

<sup>a</sup>: Peak area in area B was divided by peak area in area A.

The components with VIP greater than 1 and  $p(\text{corr}) \leq -0.7$  were extracted based on the OPLS-DA.

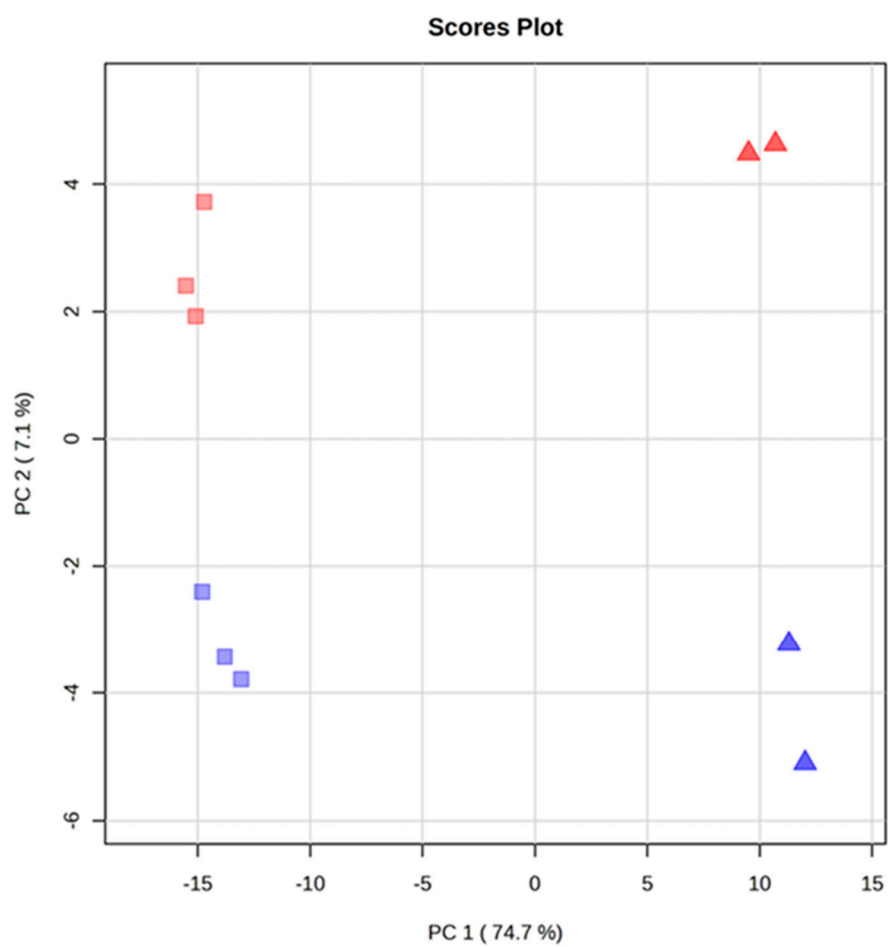

Figure S4. PCA based on the UPLC–MS spectra of the tea leaf extracts second–flush tea. Blue: area A, Red: area B, ▲: Fresh, ■: Black tea product.

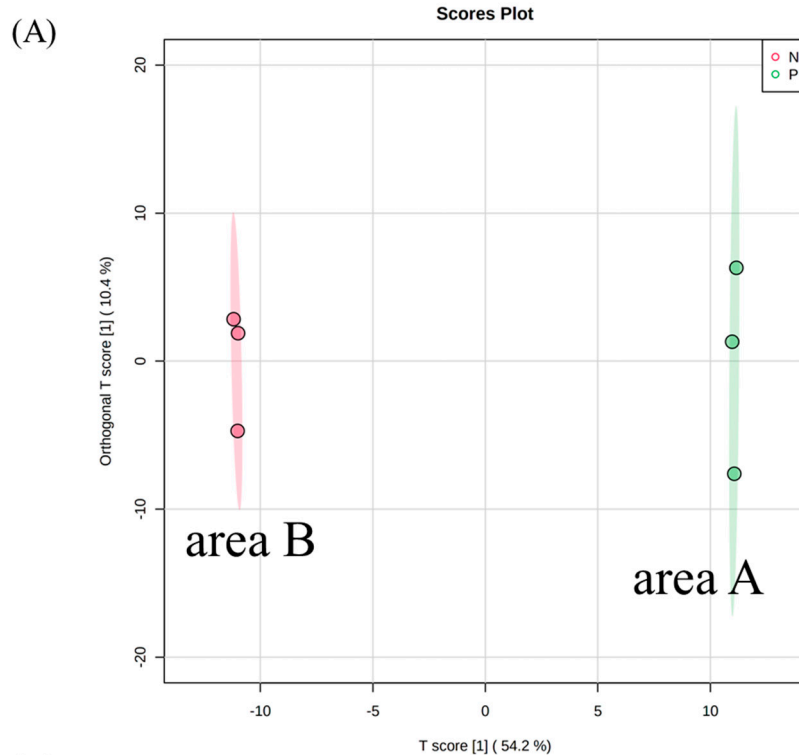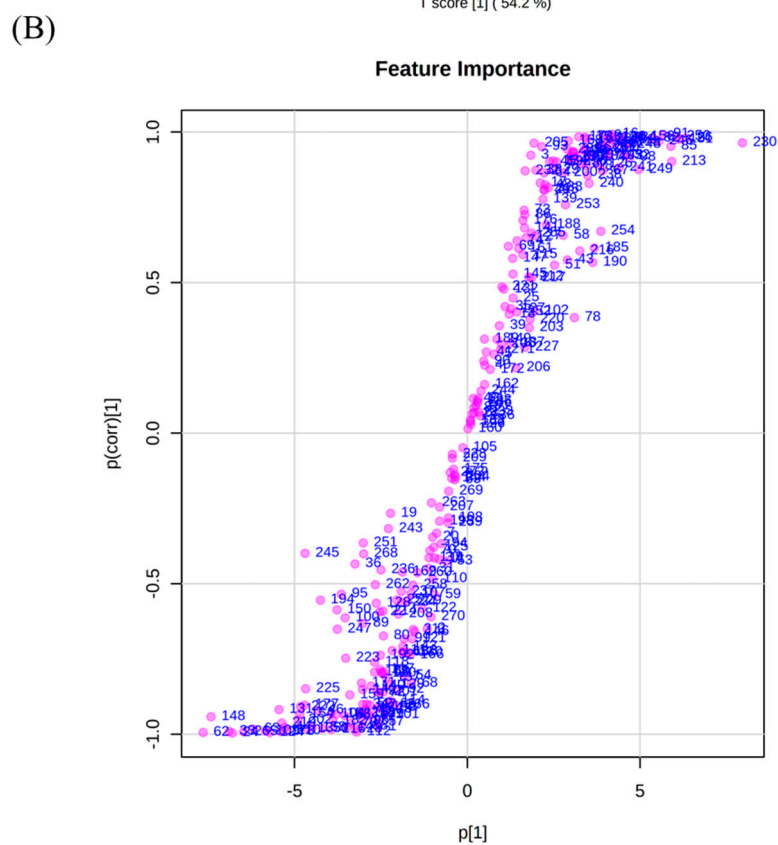

Figure S5. OPLS-DA based on the UPLC-MS spectra of the black tea leaf extracts. (A) The OPLS-DA score plot, and (B) the S-plot.

Table S3 Components abundance in area B (second-flush black tea)

| <i>m/z</i> | RT    | annotation                           |
|------------|-------|--------------------------------------|
| 297.0791   | 11.81 |                                      |
| 597.2322   | 14.53 |                                      |
| 279.0435   | 8.08  |                                      |
| 717.1462   | 22.76 | theaflavin-3'-gallate                |
| 575.1737   | 16.15 |                                      |
| 441.0831   | 11.36 |                                      |
| 899.1656   | 8.23  |                                      |
| 284.1124   | 4.63  |                                      |
| 545.1998   | 15.54 |                                      |
| 195.0853   | 8.08  | Caffeine                             |
| 217.0741   | 7.99  |                                      |
| 579.1124   | 22.19 |                                      |
| 411.1627   | 11.03 |                                      |
| 739.1251   | 22.10 | theaflavin-3-gallate <sup>a</sup>    |
| 553.0946   | 18.34 |                                      |
| 429.0825   | 19.16 |                                      |
| 717.1421   | 22.14 | theaflavin-3-gallate                 |
| 699.1330   | 22.18 |                                      |
| 337.0901   | 10.89 |                                      |
| 401.1569   | 13.70 |                                      |
| 575.0776   | 18.35 |                                      |
| 333.0618   | 9.52  |                                      |
| 427.1021   | 13.80 | ID 145                               |
| 333.0609   | 3.32  |                                      |
| 320.1108   | 10.91 |                                      |
| 257.0817   | 13.79 |                                      |
| 205.0928   | 5.16  |                                      |
| 454.0501   | 22.90 |                                      |
| 505.2261   | 11.39 |                                      |
| 188.0678   | 5.19  |                                      |
| 891.1367   | 22.92 | theaflavin-3,3'-gallate <sup>a</sup> |
| 318.0945   | 8.37  |                                      |
| 307.1158   | 11.54 |                                      |
| 333.0612   | 12.07 |                                      |

|          |       |                         |
|----------|-------|-------------------------|
| 333.0609 | 13.81 |                         |
| 439.1559 | 12.37 |                         |
| 869.1557 | 22.97 | theaflavin-3,3'-gallate |
| 411.1638 | 10.18 |                         |
| 383.1453 | 2.28  |                         |
| 487.2162 | 15.07 |                         |
| 413.1790 | 11.95 |                         |
| 193.1243 | 15.62 |                         |
| 318.0949 | 5.15  |                         |
| 334.0878 | 4.95  |                         |
| 373.1826 | 11.02 |                         |
| 259.1150 | 5.05  |                         |
| 439.2307 | 21.01 |                         |
| 487.2148 | 15.52 |                         |
| 439.2306 | 21.60 |                         |
| 457.2422 | 13.81 |                         |
| 457.2404 | 14.63 |                         |
| 487.2162 | 15.39 |                         |
| 355.1729 | 16.01 | ID 80                   |
| 355.1715 | 14.26 |                         |
| 457.2422 | 15.48 |                         |
| 457.2407 | 17.72 |                         |
| 275.0921 | 11.82 |                         |
| 333.0614 | 6.87  |                         |
| 293.0992 | 8.17  |                         |
| 378.0456 | 22.10 |                         |
| 275.1864 | 10.95 |                         |
| 935.1233 | 9.46  |                         |
| 326.0331 | 8.04  |                         |
| 373.1838 | 9.37  |                         |
| 220.1171 | 3.32  |                         |
| 913.1441 | 13.86 |                         |
| 411.1979 | 11.10 |                         |
| 731.1596 | 10.00 | ID109                   |
| 665.0463 | 9.43  |                         |
| 597.2299 | 14.57 |                         |

|          |       |
|----------|-------|
| 286.1271 | 7.85  |
| 487.2150 | 15.77 |

---

<sup>a</sup>: Annotated as a Na adduct

The components with VIP greater than 1 and  $p(\text{corr}) \leq -0.7$  were extracted based on the OPLS-DA.



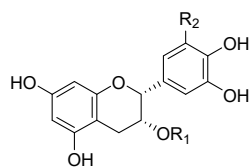

$R_1 = H, R_2 = H$  : (-)-epicatechin  
 $R_1 = H, R_2 = OH$  : (-)-epigallocatechin  
 $R_1 = G, R_2 = H$  : (-)-epicatechin gallate  
 $R_1 = G, R_2 = OH$  : (-)-epigallocatechin gallate

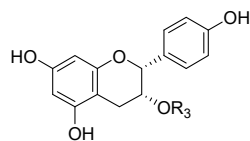

$R_3 = H$  : (-)-epiafzelechin  
 $R_3 = G$  : (-)-epiafzelechin 3-O-gallate

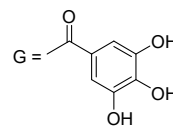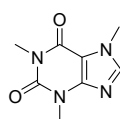

Caffeine

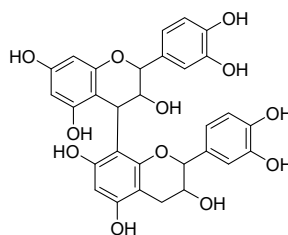

B-type procyanidin

Figure S6. The structures of catechins, caffeine and procyanidin
